# Supplementary material for: Association between functional foods and cardiometabolic health in a real-life setting: a longitudinal observational study using objective diet records from an electronic purchase system
Source: Royal Society of Chemistry journal article supplement (doi:10.1039/d1fo02434e), 2022-01-01
Supplement: d1fo02434e1.pdf [file d1fo02434e1.pdf]

Table S1. Intake amount of each food group per cafeteria visit among 775 participants 12 weeks before the follow-up examinations.

| Food groups (g) <sup>1</sup>    | Mean  | SD   |
|---------------------------------|-------|------|
| Eggs                            | 18.3  | 12.3 |
| Fish, mollusks, and crustaceans | 15.9  | 12.8 |
| Fruits                          | 3.9   | 6.4  |
| Grain (Cereal) foods            | 159.3 | 50.3 |
| Pulses                          | 23.1  | 24.5 |
| Meats                           | 102.5 | 70.8 |
| Milk and milk products          | 5.2   | 7.7  |
| Mushrooms                       | 2.3   | 2.8  |
| Nuts and seeds                  | 0.3   | 0.3  |
| Fats and Oils                   | 9.6   | 4.3  |
| Potatoes and starches           | 13.6  | 8.8  |
| Algae                           | 0.8   | 0.9  |
| Sugars and sweeteners           | 1.8   | 1.3  |
| Vegetables                      | 112.4 | 31.8 |

SD, standard deviation

<sup>1</sup> The groups were based on the classification of the Standard Tables of Food Composition in Japan - 2015 - (Seventh Revised Version).
