# Supplementary material for: Association between functional foods and cardiometabolic health in a real-life setting: a longitudinal observational study using objective diet records from an electronic purchase system
Source: Royal Society of Chemistry journal article supplement (doi:10.1039/d1fo02434e), 2022-01-01
Supplement: d1fo02434e2.pdf [file d1fo02434e2.pdf]

Table S2. Correlation coefficients between the intake of functional foods and the intake amount of each food group per visit 12 weeks before the follow-up examinations.

| Food groups <sup>1</sup>        | White rice with barley | Soy products | Catechin-rich green tea |
|---------------------------------|------------------------|--------------|-------------------------|
| Eggs                            | 0.10 ***               | 0.20 ***     | 0.15 ***                |
| Fish, mollusks, and crustaceans | 0.14 ***               | 0.20 ***     | 0.17 ***                |
| Fruits                          | −0.01                  | 0.14 ***     | 0.07 *                  |
| Grain (Cereal) foods            | −0.15 ***              | −0.24 ***    | −0.10 **                |
| Pulses                          | 0.06 *                 | 0.71 ***     | 0.06 *                  |
| Meats                           | −0.07 **               | −0.11 ***    | 0.01                    |
| Milk and milk products          | 0.03                   | 0.09 **      | 0.03                    |
| Mushrooms                       | 0.13 ***               | 0.30 ***     | 0.18 ***                |
| Nuts and seeds                  | 0.10 ***               | 0.27 ***     | 0.20 ***                |
| Fats and Oils                   | 0.03                   | −0.03        | −0.02                   |
| Potatoes and starches           | 0.14 ***               | 0.32 ***     | 0.09 **                 |
| Algae                           | 0.05                   | 0.06 *       | 0.12 ***                |
| Sugars and sweeteners           | 0.03                   | 0.10 **      | 0.06                    |
| Vegetables                      | 0.11 ***               | 0.20 ***     | 0.12 ***                |

Spearman's rank correlation coefficient

\*\*\* P < 0.001, \*\* P < 0.01, \* P < 0.05

<sup>1</sup> The groups were based on the classification of the Standard Tables of Food Composition in Japan - 2015 - (Seventh Revised Version).
